# Supplementary material for: A systematic analysis on prevalence and sub-regional distribution of undiagnosed diabetes mellitus among adults in African countries
Source: PubMed Central journal article supplement (PMC7843872; doi:10.1007/s40200-020-00635-9), 2020-09-22
Supplement: 40200_2020_635_MOESM1_ESM.pdf [file 40200_2020_635_MOESM1_ESM.pdf]

| Databases                           | Search Terms <sup>1438</sup>                                                                                                                                                                                                                                                                                                                                                                                                                                                                                                                                                                                                                                                                                                                                                                                                                                                                       | No of articles identified |
|-------------------------------------|----------------------------------------------------------------------------------------------------------------------------------------------------------------------------------------------------------------------------------------------------------------------------------------------------------------------------------------------------------------------------------------------------------------------------------------------------------------------------------------------------------------------------------------------------------------------------------------------------------------------------------------------------------------------------------------------------------------------------------------------------------------------------------------------------------------------------------------------------------------------------------------------------|---------------------------|
| <b>PubMed</b>                       | ("epidemiology"[Subheading] OR "epidemiology"[All Fields] OR "prevalence"[All Fields] OR "prevalence"[MeSH Terms]) AND undiagnosed[All Fields]) AND ("diabetes mellitus"[MeSH Terms] OR ("diabetes"[All Fields] AND "mellitus"[All Fields]) OR "diabetes mellitus"[All Fields])) OR ("diabetes mellitus"[MeSH Terms] OR ("diabetes"[All Fields] AND "mellitus"[All Fields]) OR "diabetes mellitus"[All Fields] OR "diabetes"[All Fields] OR "diabetes insipidus"[MeSH Terms] OR ("diabetes"[All Fields] AND "insipidus"[All Fields]) OR "diabetes insipidus"[All Fields])) AND mellitus[All Fields]) AND ("adult"[MeSH Terms] OR "adult"[All Fields])) AND ("population"[MeSH Terms] OR "population"[All Fields] OR "population groups"[MeSH Terms] OR ("population"[All Fields] AND "groups"[All Fields]) OR "population groups"[All Fields])) AND ("africa"[MeSH Terms] OR "africa"[All Fields]) | 1187                      |
| <b>CINAHL (Plus with full text)</b> | <p><b>Thesaurus terms:</b> Prevalence, undiagnosed, diabetes mellitus, adult, population, Africa</p> <p><b>Search Terms:</b> " Prevalence *" OR Epidemiology * OR " burden *" and " undiagnosed *" OR " Hiden " AND " diabetes mellitus "OR" diabetes " AND mellitus AND "Africa</p> <p>(S1): filter: English, peer reviewed, exclude Medline</p> <p>(S2): with additional filter: Africa</p> <p>S1 OR S2</p>                                                                                                                                                                                                                                                                                                                                                                                                                                                                                      | 33                        |
| <b>Cochrane Library</b>             | <p><b>MeSH terms:</b> Prevalence (MeSH), undiagnosed (MeSH), diabetes mellitus (MeSH), adult (MeSH), population (MeSH), Africa (MeSH).</p> <p><b>Search Terms:</b> (Prevalence * OR Epidemiology * AND undiagnosed * AND (diabetes mellitus [MeSH] OR diabetes [MeSH] AND mellitus *AND Adult *AND population *AND Africa AND English [la]</p>                                                                                                                                                                                                                                                                                                                                                                                                                                                                                                                                                     | 19                        |
| <b>Embase</b>                       | <p><b>Emtree terms:</b> Prevalence, undiagnosed, diabetes mellitus, adult, population, Africa</p>                                                                                                                                                                                                                                                                                                                                                                                                                                                                                                                                                                                                                                                                                                                                                                                                  | 23                        |

|                                                                              |                                                                                                                                                                                                                                                                                                                                                                                                                                                                                                                 |            |
|------------------------------------------------------------------------------|-----------------------------------------------------------------------------------------------------------------------------------------------------------------------------------------------------------------------------------------------------------------------------------------------------------------------------------------------------------------------------------------------------------------------------------------------------------------------------------------------------------------|------------|
|                                                                              | <p><b>Search 1 Terms:</b> (Prevalence * OR epidimeology *AND undiagnosed * AND (diabetes mellitus * OR diabetes *AND mellitus *AND Adult *AND population *AND Africa (embase) NOT (medline))</p> <p><b>Search 2 Terms:</b><br/>         (Prevalence NEXT/1 epidemiology * AND undiagnosed * NEXT/1 Hidden * AND diabetes mellitus NEXT/1 phone* AND (diabetes OR mellitus) AND (Adult) AND population and Africa AND english:la AND [embase]/lim NOT [medline]/lim filter English only and excluded Medline</p> |            |
| <p><b>Others websites and Grey Literature; Google and Google Scholar</b></p> | <p>Variety of key terms used from above searches</p>                                                                                                                                                                                                                                                                                                                                                                                                                                                            | <p>176</p> |
