# Supplementary material for: A systematic analysis on prevalence and sub-regional distribution of undiagnosed diabetes mellitus among adults in African countries
Source: PubMed Central journal article supplement (PMC7843872; doi:10.1007/s40200-020-00635-9), 2020-09-22
Supplement: 40200_2020_635_MOESM2_ESM.pdf [file 40200_2020_635_MOESM2_ESM.pdf]

| Table S1: Risk of Bias assessment Tool of Eligible Articles by using the Hoy 2012 tool |                        |                    |           |                     |                      |                    |                 |                                           |                              |                      |                              |                       |
|----------------------------------------------------------------------------------------|------------------------|--------------------|-----------|---------------------|----------------------|--------------------|-----------------|-------------------------------------------|------------------------------|----------------------|------------------------------|-----------------------|
| NO                                                                                     | Study ID               | Representa<br>tion | Sampling  | Random<br>selection | Non response<br>bias | Data<br>collection | Case Definition | Reliability and validity<br>of study tool | Method of data<br>collection | Prevalence<br>period | Numerator and<br>denominator | Summary<br>Assessment |
| 1                                                                                      | Bouguerra, R., et al   | Low risk           | Low risk  | High risk           | Low risk             | Low risk           | Low risk        | High risk                                 | Low risk                     | Low risk             | Low risk                     | Medium risk           |
| 2                                                                                      | Megerssa YC, et al     | High risk          | Low risk  | Low risk            | High risk            | Low risk           | Low risk        | Low risk                                  | Low risk                     | Low risk             | Low risk                     | Low risk              |
| 3                                                                                      | Abebe et al            | Low risk           | Low risk  | High risk           | High risk            | Low risk           | Low risk        | High risk                                 | Low risk                     | Low risk             | Low risk                     | Medium risk           |
| 4                                                                                      | Sagna Y et al          | Low risk           | Low risk  | High risk           | Low risk             | High risk          | High risk       | High risk                                 | Low risk                     | Low risk             | Low risk                     | High risk             |
| 5                                                                                      | Seifu W et al          | Low risk           | Low risk  | Low risk            | Low risk             | Low risk           | Low risk        | Low risk                                  | Low risk                     | Low risk             | Low risk                     | Low risk              |
| 6                                                                                      | Noor et al             | Low risk           | Low risk  | High risk           | Low risk             | Low risk           | Low risk        | Low risk                                  | Low risk                     | Low risk             | Low risk                     | Medium risk           |
| 7                                                                                      | Djolo, F. et al        | Low risk           | High risk | High risk           | High risk            | High risk          | High risk       | High risk                                 | High risk                    | High risk            | High risk                    | High risk             |
| 8                                                                                      | Bailey SL et al        | High risk          | High risk | High risk           | High risk            | High risk          | High risk       | High risk                                 | High risk                    | High risk            | High risk                    | High risk             |
| 9                                                                                      | Bailey SL et al        | High risk          | High risk | Low risk            | Low risk             | Low risk           | Low risk        | Low risk                                  | Low risk                     | Low risk             | Low risk                     | Low risk              |
| 10                                                                                     | Birhanu S. et al       | Low risk           | Low risk  | Low risk            | Low risk             | Low risk           | Low risk        | Low risk                                  | Low risk                     | Low risk             | Low risk                     | Low risk              |
| 11                                                                                     | Zahran AM et al        | Low risk           | Low risk  | Low risk            | Low risk             | Low risk           | High risk       | Low risk                                  | Low risk                     | Low risk             | Low risk                     | Low risk              |
| 12                                                                                     | Bernard Omech et al    | High risk          | Low risk  | Low risk            | High risk            | Low risk           | Low risk        | High risk                                 | Low risk                     | Low risk             | Low risk                     | High risk             |
| 13                                                                                     | Woreda et al           | High risk          | Low risk  | Low risk            | High risk            | Low risk           | Low risk        | Low risk                                  | Low risk                     | Low risk             | Low risk                     | Low risk              |
| 14                                                                                     | Alex Kojo Anderson     | Low risk           | Low risk  | Low risk            | Low risk             | Low risk           | Low risk        | Low risk                                  | Low risk                     | Low risk             | Low risk                     | Low risk              |
| 15                                                                                     | Elvis Tarkang et al    | Low risk           | Low risk  | Low risk            | Low risk             | Low risk           | High risk       | Low risk                                  | Low risk                     | Low risk             | Low risk                     | Low risk              |
| 16                                                                                     | Elvis Tarkang et al    | Low risk           | Low risk  | Low risk            | Low risk             | Low risk           | Low risk        | Low risk                                  | Low risk                     | Low risk             | Low risk                     | Low risk              |
| 17                                                                                     | A.T. Wondemagegn et al | Low risk           | Low risk  | Low risk            | Low risk             | Low risk           | Low risk        | Low risk                                  | Low risk                     | Low risk             | Low risk                     | Low risk              |
| 18                                                                                     | Kweku et al            | Low risk           | Low risk  | Low risk            | Low risk             | Low risk           | Low risk        | Low risk                                  | Low risk                     | Low risk             | Low risk                     | Low risk              |
| 19                                                                                     | Wondemagegn et al      | Low risk           | Low risk  | Low risk            | Low risk             | Low risk           | Low risk        | Low risk                                  | Low risk                     | Low risk             | Low risk                     | Low risk              |
| 20                                                                                     | Animaw W, Seyoum Y     | Low risk           | Low risk  | Low risk            | Low risk             | Low risk           | Low risk        | Low risk                                  | Low risk                     | Low risk             | Low risk                     | Low risk              |
| 21                                                                                     | Bantie, G. M et al     | Low risk           | Low risk  | Low risk            | Low risk             | Low risk           | Low risk        | Low risk                                  | Low risk                     | Low risk             | Low risk                     | Low risk              |
| 22                                                                                     | Endris T               | Low risk           | Low risk  | Low risk            | Low risk             | Low risk           | Low risk        | Low risk                                  | Low risk                     | Low risk             | Low risk                     | Low risk              |
| 23                                                                                     | Dereje N, et al        | Low risk           | Low risk  | Low risk            | Low risk             | Low risk           | Low risk        | Low risk                                  | Low risk                     | Low risk             | Low risk                     | Low risk              |
| 24                                                                                     | Abebe SM et al         | Low risk           | Low risk  | Low risk            | Low risk             | Low risk           | Low risk        | Low risk                                  | Low risk                     | Low risk             | Low risk                     | Low risk              |

25  
26 **Risk of bias assessment tool: Yes (low risk); No (high risk)**

- 27 1. Representation: Was the study population a close representation of the national population?  
 28 2. Sampling: Was the sampling frame a true or close representation of the target population?  
 29 3. Random selection: Was some form of random selection used to select the sample OR was a census undertaken?  
 30 4. Non-response bias: Was the likelihood of non-response bias minimal?  
 31 5. Data collection: Were data collected directly from the subjects?  
 32 6. Case definition: Was an acceptable case definition used in the study?  
 33 7. Reliability and validity of study tool: Was the study instrument that measured the parameter of interest show to have reliability and validity?  
 34 8. Data collection: Was the same mode of data collection used for all subjects?  
 35 9. Prevalence period: Was the length of the prevalence period for the parameter of interest appropriate?  
 36 10. Numerators and denominators: Were the numerator(s) and denominator(s) for the parameter of interest appropriate?

The overall risk of bias scored based on the number of high risk of bias per study: low risk (≤2), moderate risk (3–4), and high risk (≥5).
